# Supplementary material for: A portable SERS sensing platform for the multiplex identification and quantification of pesticide residues on plant leaves
Source: Royal Society of Chemistry journal article supplement (doi:10.1039/d2tc02926j), 2022-01-01
Supplement: d2tc02926j1.pdf [file d2tc02926j1.pdf]

## **Portable Surface-Enhanced Raman Scattering Sensor for Multiplex Identification and Quantification of Pesticide Residues in Plant Leaves**

Cheng Ye, <sup>a</sup> Meng He, <sup>a</sup> Zhengdong Zhu, <sup>a</sup> Xiaoyi Shi, <sup>a</sup> Maofeng Zhang, <sup>\*a</sup> Zhiyong Bao, <sup>b</sup> Youju Huang, <sup>\*c</sup> Changlong Jiang, <sup>\*d</sup> Jianhua Li, <sup>e</sup> Yucheng Wu <sup>b</sup>

<sup>a</sup> School of Chemistry and Chemical Engineering, Hefei University of Technology, 193 Tunxi Road, Hefei, 230009, China

<sup>b</sup> School of Materials Science and Engineering, Hefei University of Technology, 193 Tunxi Road, Hefei, 230009, China

<sup>c</sup> College of Materials, Chemistry and Chemical Engineering, Hangzhou Normal University, Hangzhou 311121, China

<sup>d</sup> Institute of Solid State Physics, Hefei Institutes of Physical Science, Chinese Academy of Sciences, Hefei, Anhui, 230031, China

<sup>e</sup> Anhui Topway Testing Services Co. Ltd., 18 Rixin Road, Xuancheng Economic and Technological Development Zone, 242000, China

\*Corresponding Authors E-mail: mfzhang@hfut.edu.cn , yjhuang@hznu.edu.cn, cljiang@iim.ac.cn

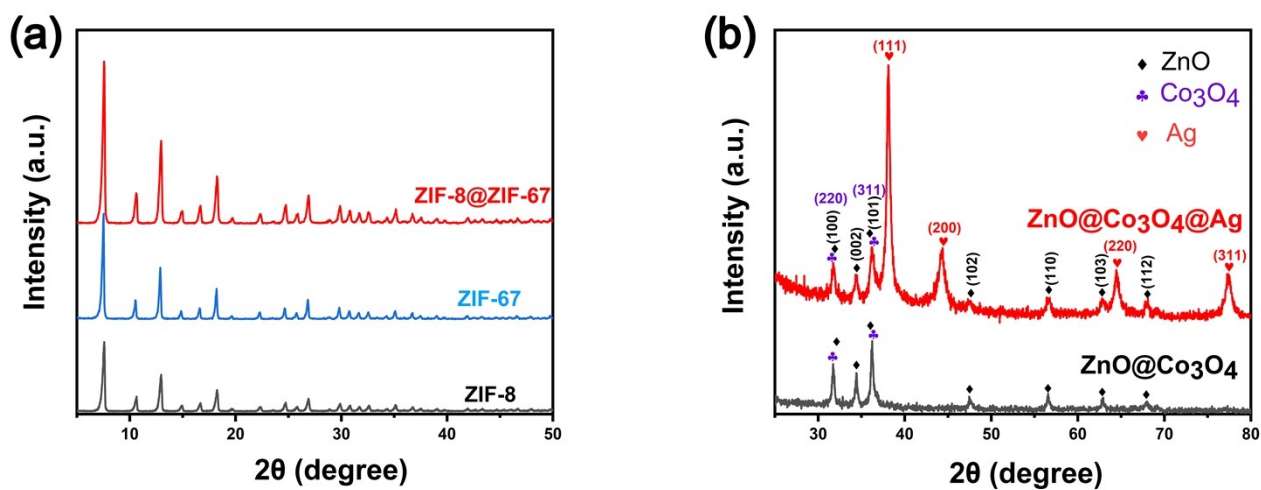

**Fig. S1** XRD patterns of different samples: (a) ZIF-8, ZIF-67 and ZIF-8@ZIF-67. (b) ZnO@Co<sub>3</sub>O<sub>4</sub> and ZnO@Co<sub>3</sub>O<sub>4</sub>@Ag.

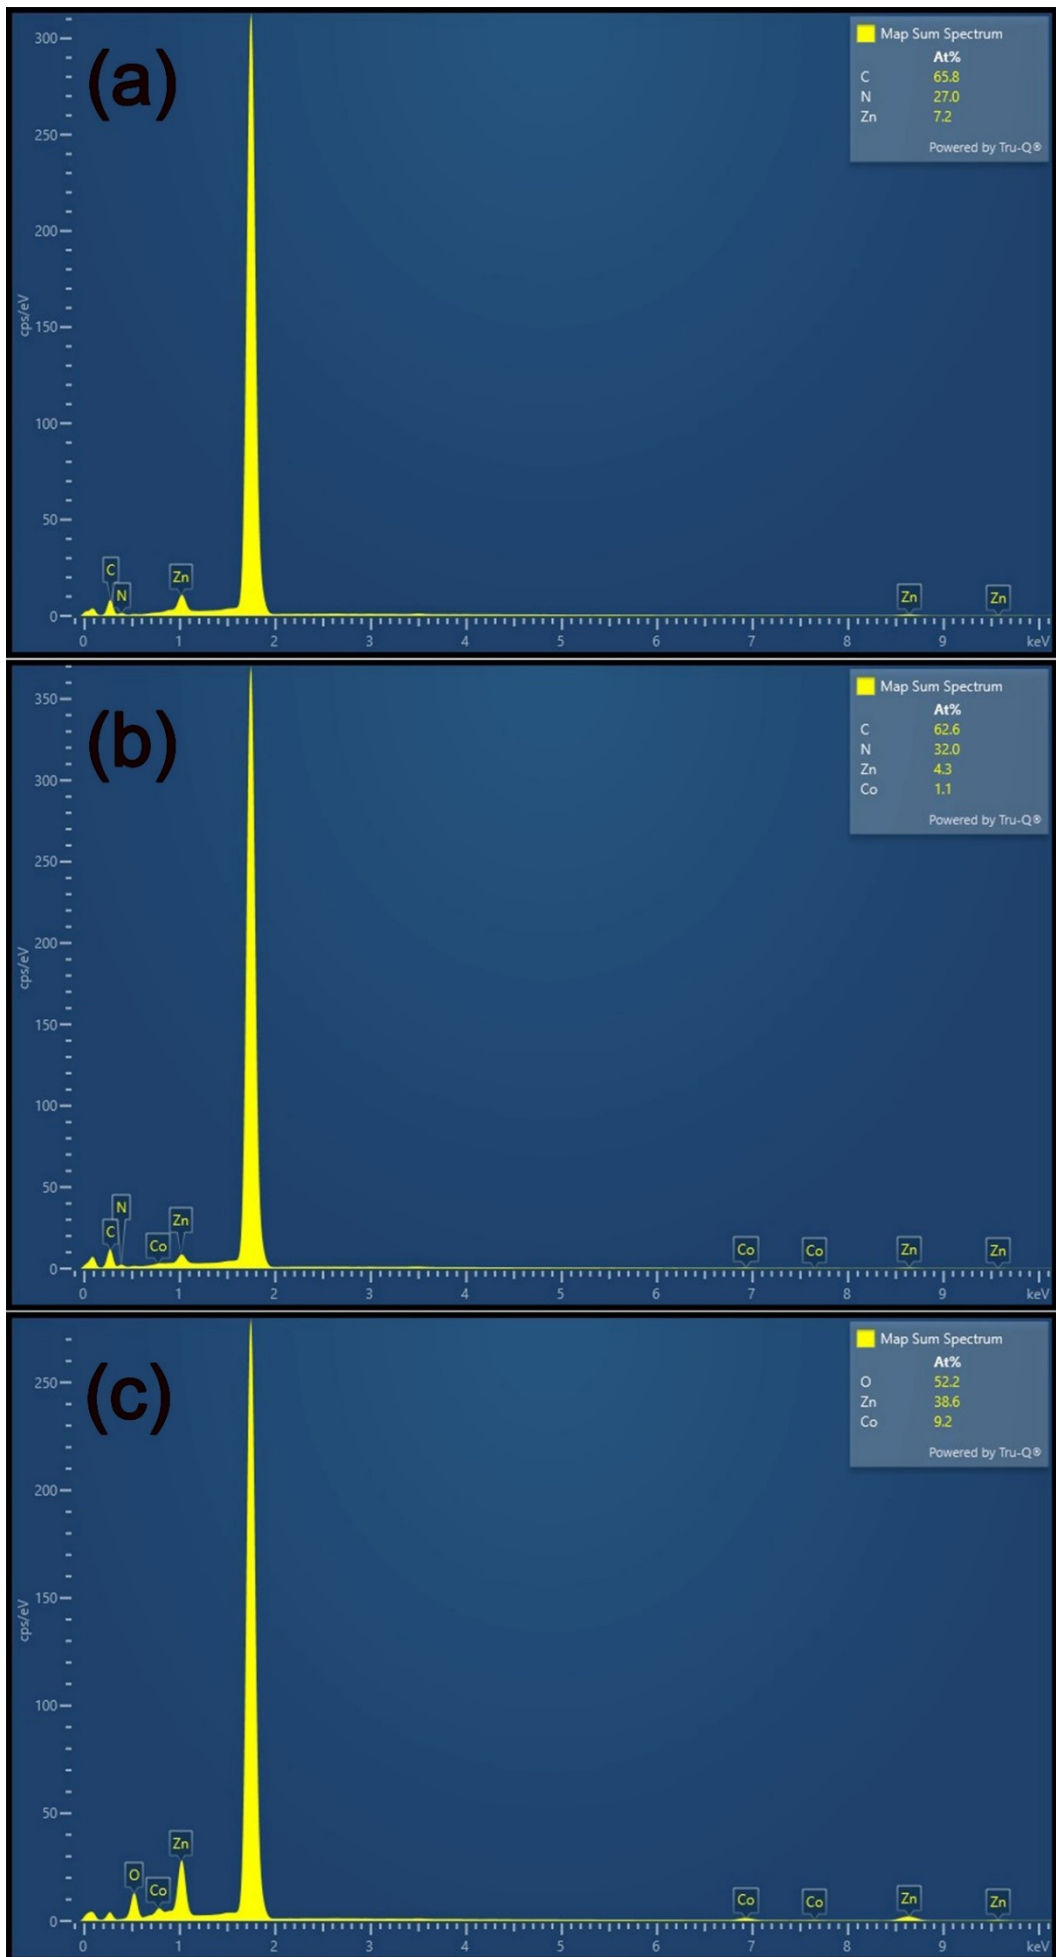

**Fig. S2** EDS spectra of (a) ZIF-8, (b)ZIF-8@ZIF-67, and (c)ZnO@Co<sub>3</sub>O<sub>4</sub>.

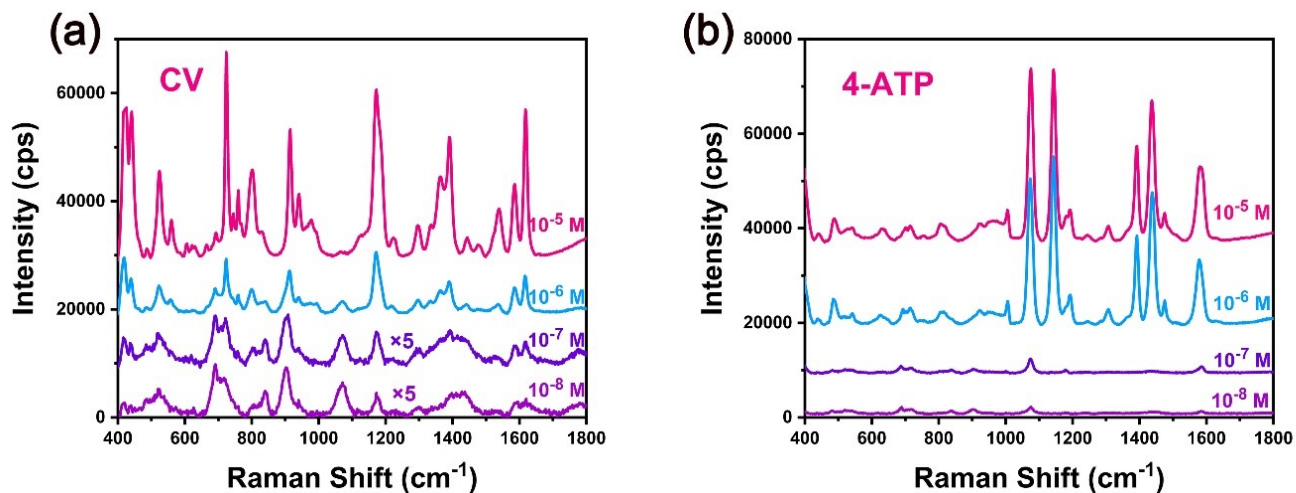

**Fig. S3** SERS spectra obtained from different concentrations of (a) CV and (b) 4-ATP dropped on the ZnO@Co<sub>3</sub>O<sub>4</sub>@Ag substrate.

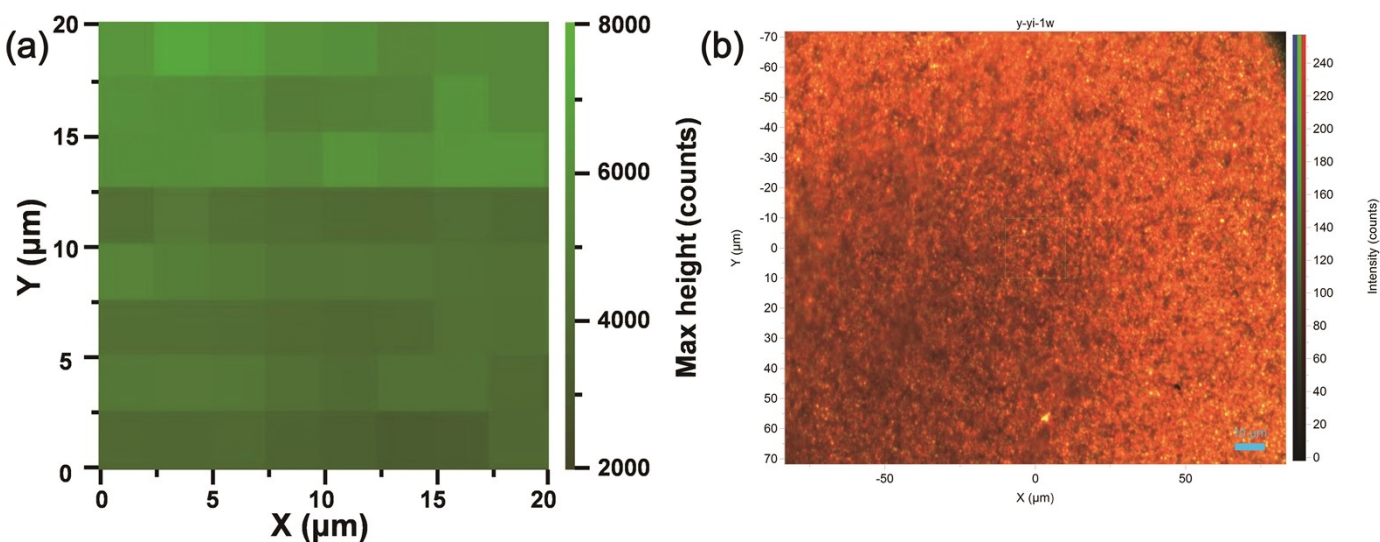

**Fig. S4** (a) SERS mapping of the 1172  $\text{cm}^{-1}$  peak of CV adsorbed on the ZnO@Co<sub>3</sub>O<sub>4</sub>@Ag substrate; (b) Electron microscopic image of substrate.

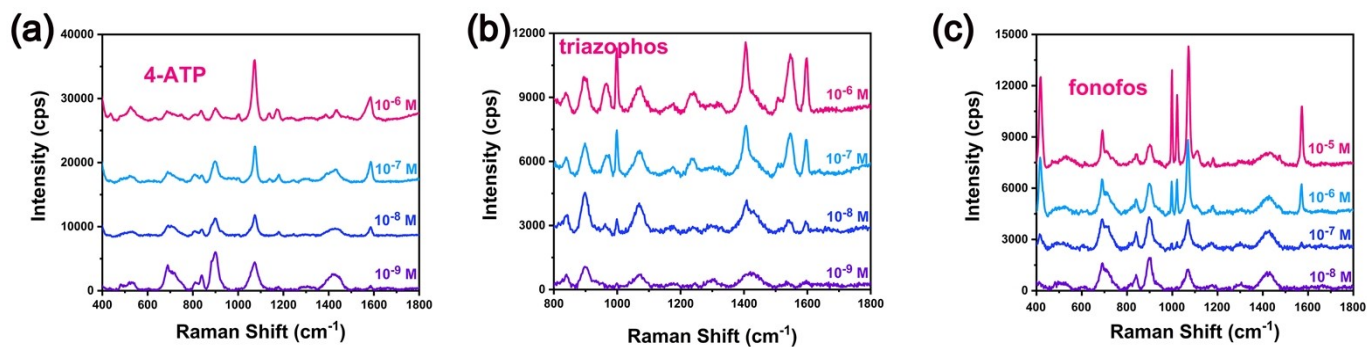

**Fig. S5** SERS spectra obtained from the ZnO@Co<sub>3</sub>O<sub>4</sub>@Ag substrate immersed at different concentrations of (a) 4-ATP, (b) triazophos, and (c) fonofos for 2h.

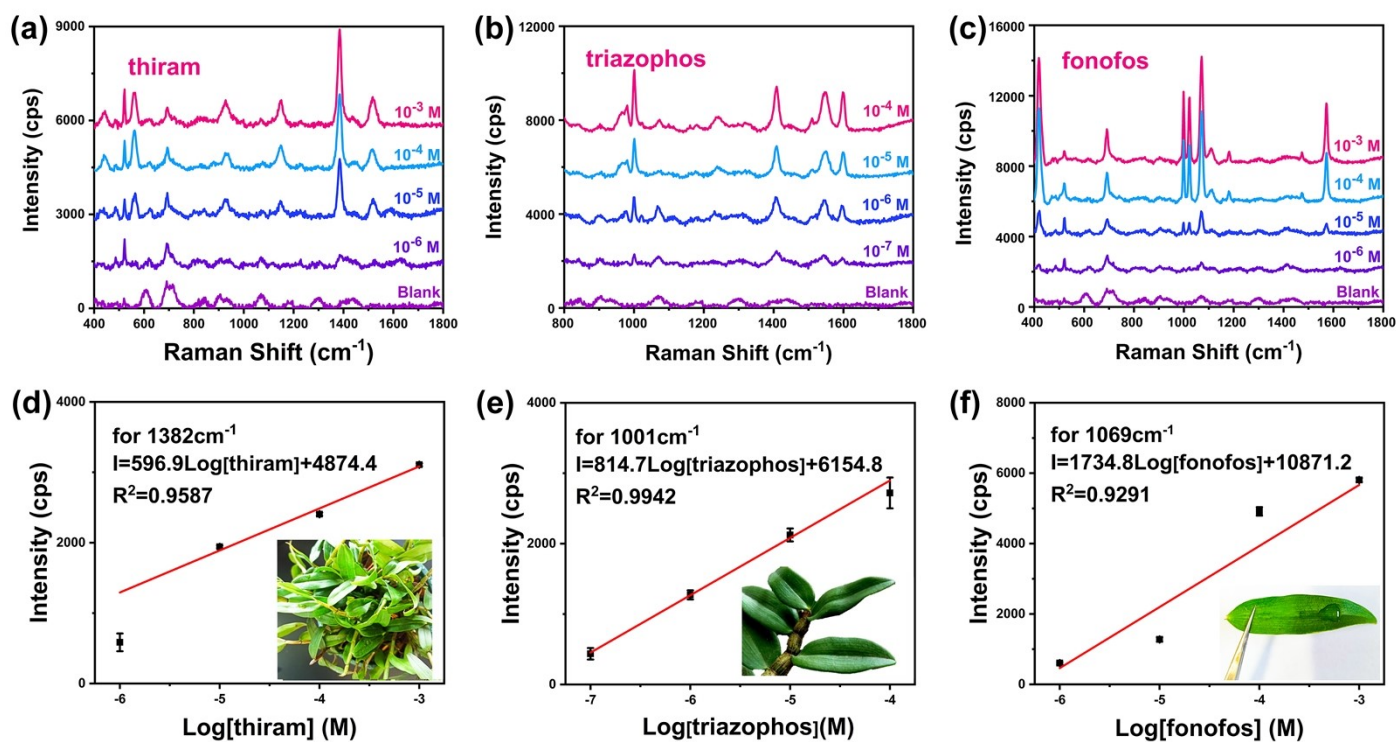

**Fig. S6** SERS spectra obtained from dendrobium leaves with different concentrations of (a) thiram, (b) triazophos and (c) fonofos using ZnO@Co<sub>3</sub>O<sub>4</sub>@Ag sensor. (d-f) Corresponding linear relationship between Raman intensity and detected concentrations.

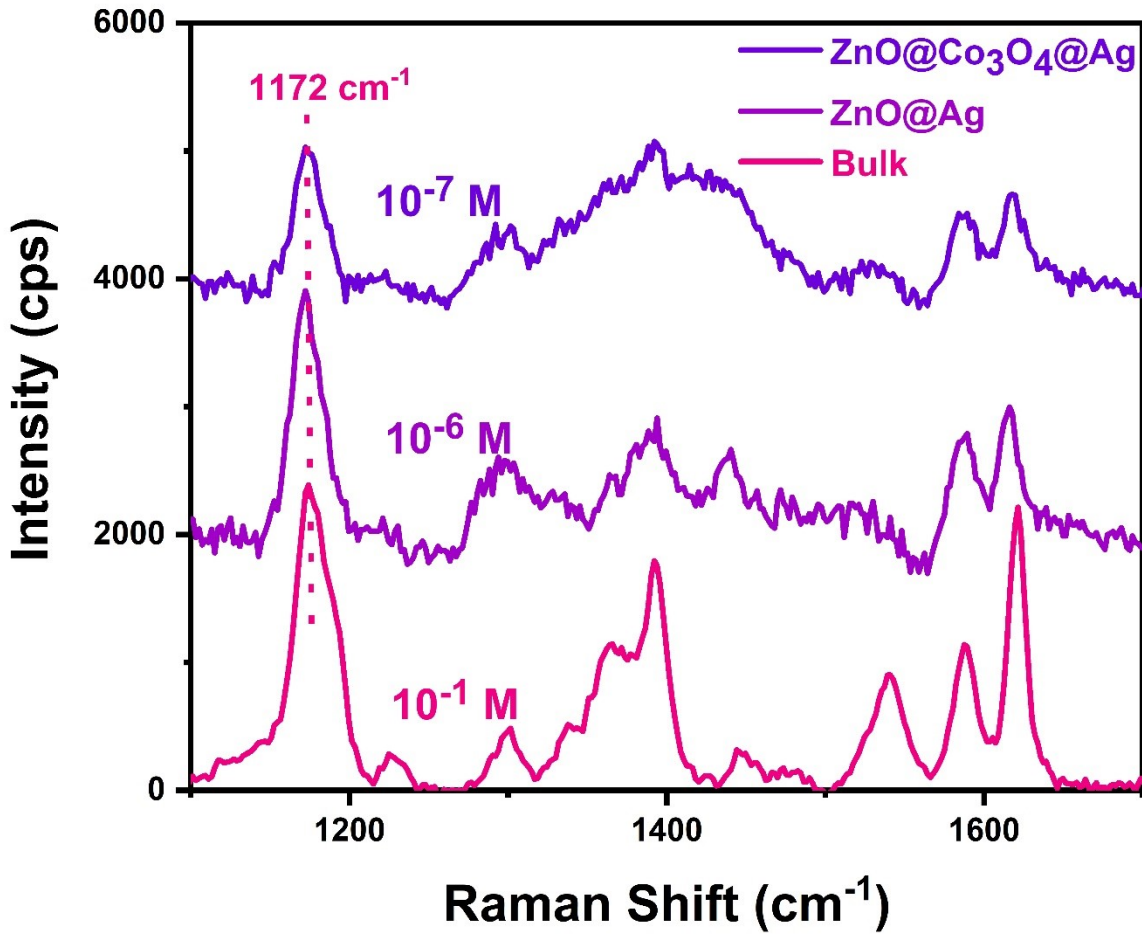

**Fig. S7.** SERS spectra obtained from bulk CV ( $10^{-1}$  M), ZnO@Ag substrate with CV ( $10^{-6}$  M) and ZnO@Co<sub>3</sub>O<sub>4</sub>@Ag substrate with CV ( $10^{-7}$  M)

#### Calculation of SERS enhancement factor (EF)

To quantify the enhancement contribution from ZnO@Ag and ZnO@Co<sub>3</sub>O<sub>4</sub>@Ag substrates, we calculated their enhancement factor (EF) based on the following formula:

$$EF = (I_{SERS} / I_{BULK}) \times (N_{BULK} / N_{SERS})$$

where  $I_{SERS}$  and  $I_{BULK}$  represent the intensities of SERS and normal Raman scattering, whereas  $N_{SERS}$  and  $N_{BULK}$ , respectively, denote the numbers of corresponding CV molecules effectively excited by a laser beam. According to the above formula, the EF for the ZnO@Ag substrate is calculated to be  $7.45 \times 10^5$ . The EF is calculated to be  $4.95 \times 10^6$  for the ZnO@Co<sub>3</sub>O<sub>4</sub>@Ag substrate.

$$N_{BULK} = (\text{Laser spot area} / \text{Diffusion area}) * (N_A * \text{Volume}_{BULK} * \text{Concentration}_{BULK})$$

$$N_{SERS} = (\text{Laser spot area} / \text{Substrate area}) * (N_A * \text{Volume}_{SERS} * \text{Concentration}_{SERS})$$

$$\text{Diffusion area} = \pi(d/2)^2 = 0.5027 \text{ cm}^2$$

$$\text{Substrate area} = 0.25 \text{ cm}^2$$

$$\text{Volume}_{\text{BULK}} = \text{Volume}_{\text{SERS}}$$

$$\text{Concentration}_{\text{BULK}} = 10^6 * \text{Concentration}_{\text{SERS}}$$

$$N_{\text{BULK}} / N_{\text{SERS}} = (0.25/0.5027) \times 10^6 = 5 \times 10^5$$

I = intensity of the 1172 cm<sup>-1</sup> peak

$$I_{\text{BULK}} = 29088.9 \text{ a.u.}$$

$$I_{\text{SERS, ZnO@Ag}} = 43493.9 \text{ a.u.}$$

$$I_{\text{SERS, ZnO@Ag}} / I_{\text{BULK}} = 1.49$$

$$\text{EF} = (I_{\text{SERS}} / I_{\text{BULK}}) \times (N_{\text{BULK}} / N_{\text{SERS}}) = 7.45 \times 10^5$$

$$I_{\text{SERS, ZnO@Co}_3\text{O}_4\text{@Ag}} = 28826.6 \text{ a.u.}$$

$$I_{\text{SERS, ZnO@Co}_3\text{O}_4\text{@Ag}} / I_{\text{BULK}} = 0.99$$

$$\text{EF} = (I_{\text{SERS}} / I_{\text{BULK}}) \times (N_{\text{BULK}} / N_{\text{SERS}}) = 4.95 \times 10^6.$$
